# Supplementary material for: Relative biomembrane fusogenicities of the tumor-selective liposomes of RGDK- and CGKRK-lipopeptides
Source: Royal Society of Chemistry journal article supplement (doi:10.1039/d4nr00450g), 2024-01-01
Supplement: d4nr00450g1.pdf [file d4nr00450g1.pdf]

## Supplementary Information

### On the relative biomembrane fusogenicities of the tumor-selective liposomes of RGDK- and CGKRRK- lipopeptides

Wahida Rahaman,<sup>a</sup> and Arabinda Chaudhuri.<sup>a,\*</sup>

<sup>a</sup>Department of Chemical Sciences, Indian Institute of Science Education and Research  
Kolkata, Mohanpur, Nadia-741246, West Bengal, India.

\* To whom correspondences should be addressed

E-mail: [arabinda.chaudhuri@iiserkol.ac.in](mailto:arabinda.chaudhuri@iiserkol.ac.in)

| Table of Contents                                                                                                                                                                          | Page |
|--------------------------------------------------------------------------------------------------------------------------------------------------------------------------------------------|------|
| <b>Figure S1, Part A.</b> Scheme for synthesis of protected RGDK-peptide ( <b>A</b> ).                                                                                                     | S2   |
| <b>Part B,</b> Scheme for synthesis of RGDK-lipopeptide <b>I</b> .                                                                                                                         | S3   |
| <b>Figure S2,Part A.</b> Scheme for synthesis of protected CGKRRK-peptide ( <b>A</b> ).                                                                                                    | S4   |
| <b>Part B.</b> Scheme for synthesis of CGKRRK-lipopeptide <b>II</b> .                                                                                                                      | S5   |
| <b>FigureS3.</b> ESI-MS of protected RGDK-peptide ( <b>A</b> ).                                                                                                                            | S6   |
| <b>Figure S4.</b> HRMS of protected RGDK-lipopeptide ( <b>B</b> ).                                                                                                                         | S7   |
| <b>Figure S5.</b> ESI-MS of final RGDK-lipopeptide ( <b>I</b> )                                                                                                                            | S8   |
| <b>Figure S6.</b> HRMS of protected CGKRRK-peptide ( <b>A</b> )                                                                                                                            | S9   |
| <b>Figure S7.</b> ESI-MS of protected CGKRRK-lipopeptide ( <b>B</b> )                                                                                                                      | S10  |
| <b>Figure S8.</b> ESI-MS of final CGKRRK-lipopeptide ( <b>II</b> )                                                                                                                         | S11  |
| <b>Figure S9. Part A.</b> HPLC profile of pegylated RGDK-lipopeptide in pure MeOH.                                                                                                         | S12  |
| <b>Figure S9. Part B.</b> HPLC profile of pegylated RGDK-lipopeptide in 95:5 (v/v)<br>MeOH:water.                                                                                          | S13  |
| <b>Figure S10. Part A.</b> HPLC profile of CGKRRK-lipopeptide in pure MeOH.                                                                                                                | S14  |
| <b>Figure S10: Part B.</b> HPLC profile of CGKRRK-lipopeptide in 95:5 (v/v)<br>MeOH:water.                                                                                                 | S15  |
| <b>Figure S11:</b> Biomembrane fusogenicities of both the liposomes of RGDK-lipopeptide ( <b>A</b> )<br>and CGKRRK-lipopeptide ( <b>B</b> ) with model biomembranes containing error bars. | S16  |

**Part A.**

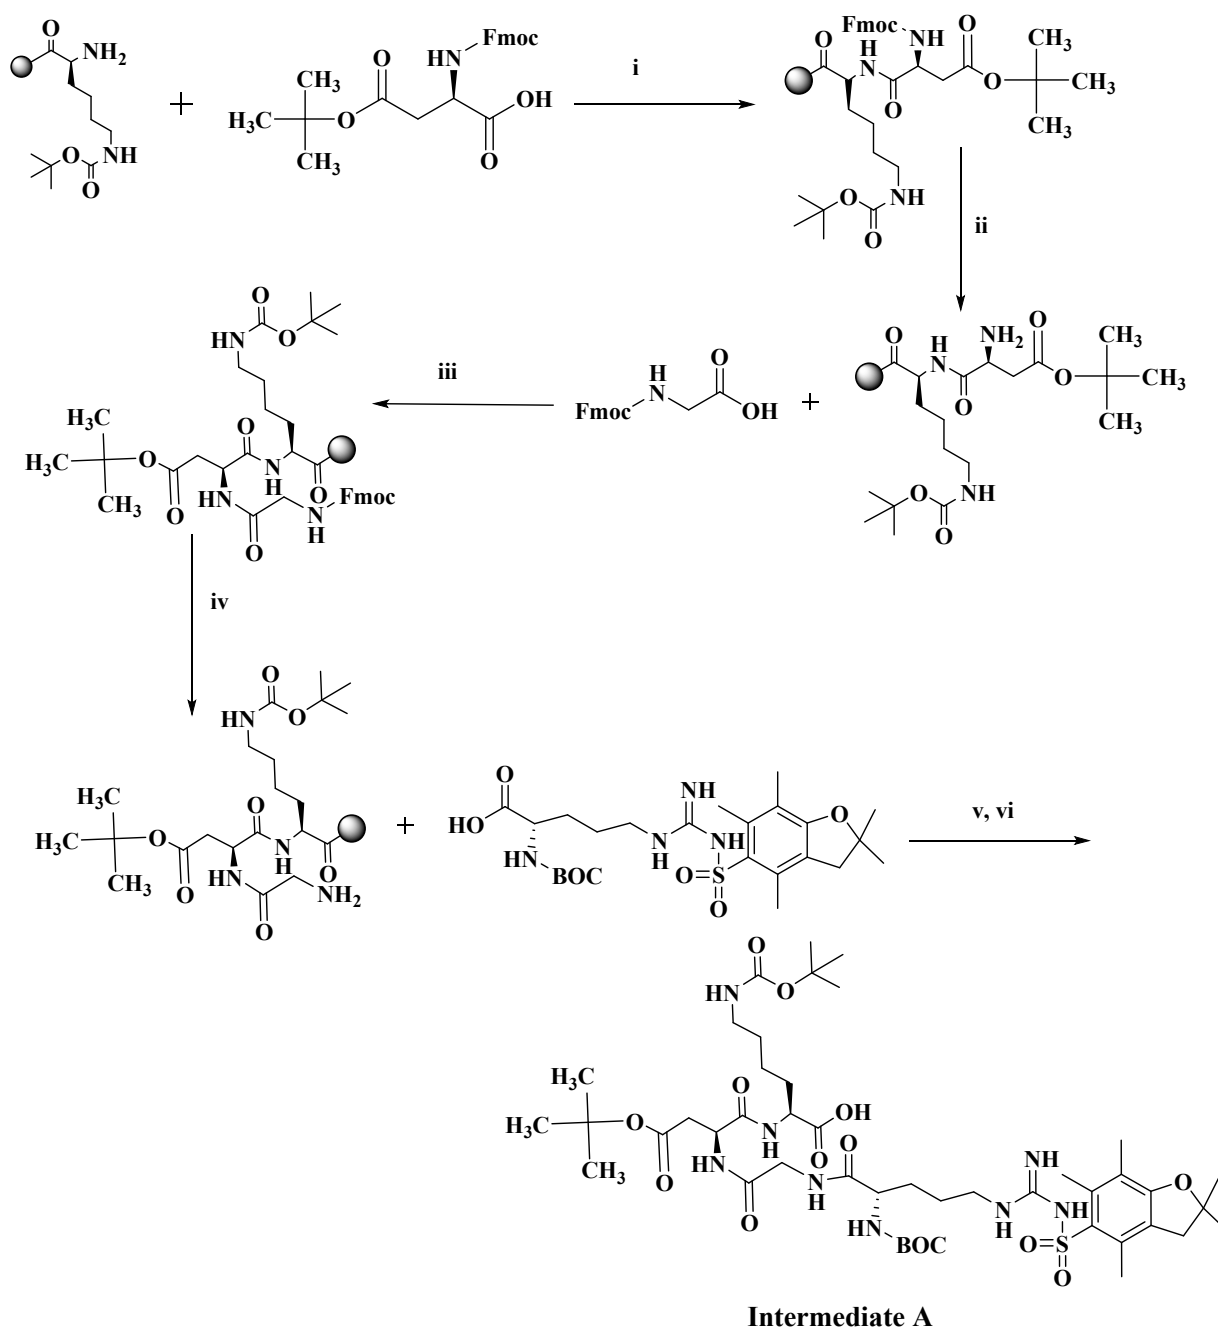

**Reagents:** i. Fmoc-Asp(OtBu)-OH, DMF, HBTU, DIPEA, 3 h; ii. 20% piperidine DMF (1:4) (v/v), 30 min; iii. Fmoc-Gly-OH, DMF, HBTU, DIPEA, 3 h. iv. 20% piperidine DMF (1:4) (v/v), 30 min; v. Boc-Arg(Pbf)-OH, HBTU, DIPEA, DMF, 3 h; vi. 0.25% TFA/DCM, 3 h, 0 °C, DCM.

**Figure S1A.** Scheme for synthesis of protected RGDK-peptide.

## Part B

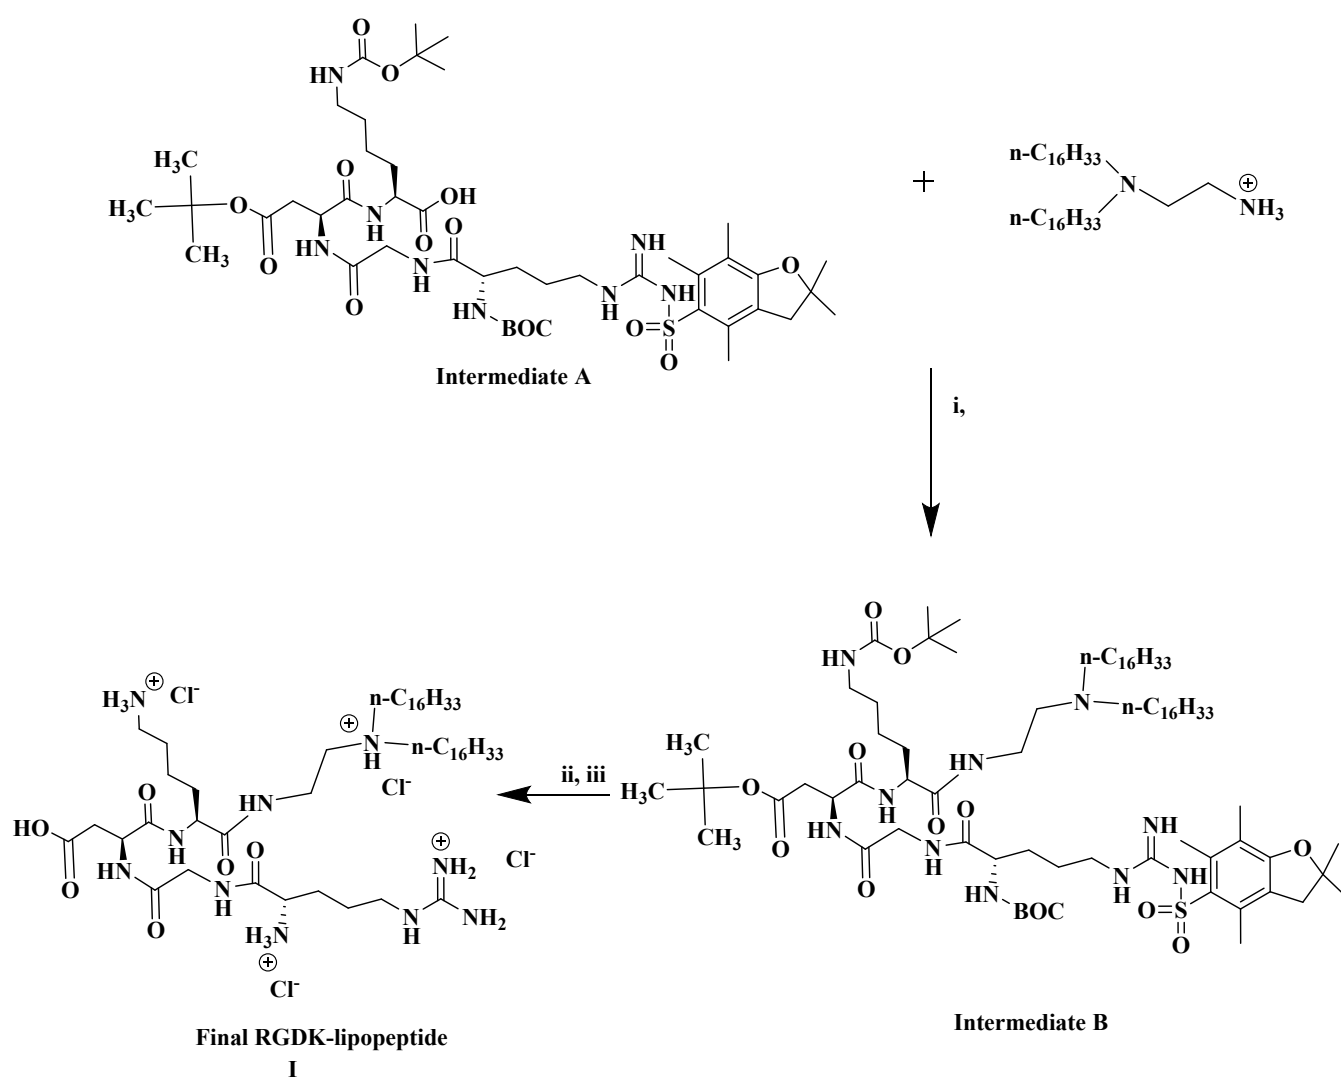

**Reagents:** i.  $N^1, N^1$ -dihexadecylethane-1,2-diamine, EDCI, HOBT, dry DCM, DIPEA, 0 °C-RT, 24 h; ii. TFA-TIS (95:5) TFA, 12 h, RT; iii. Amberlite IR 400 Cl<sup>-</sup> ion exchange resin, MeOH.

**Figure S1B.** Scheme for synthesis of RGDK-lipopeptide (I).

**Part A.**

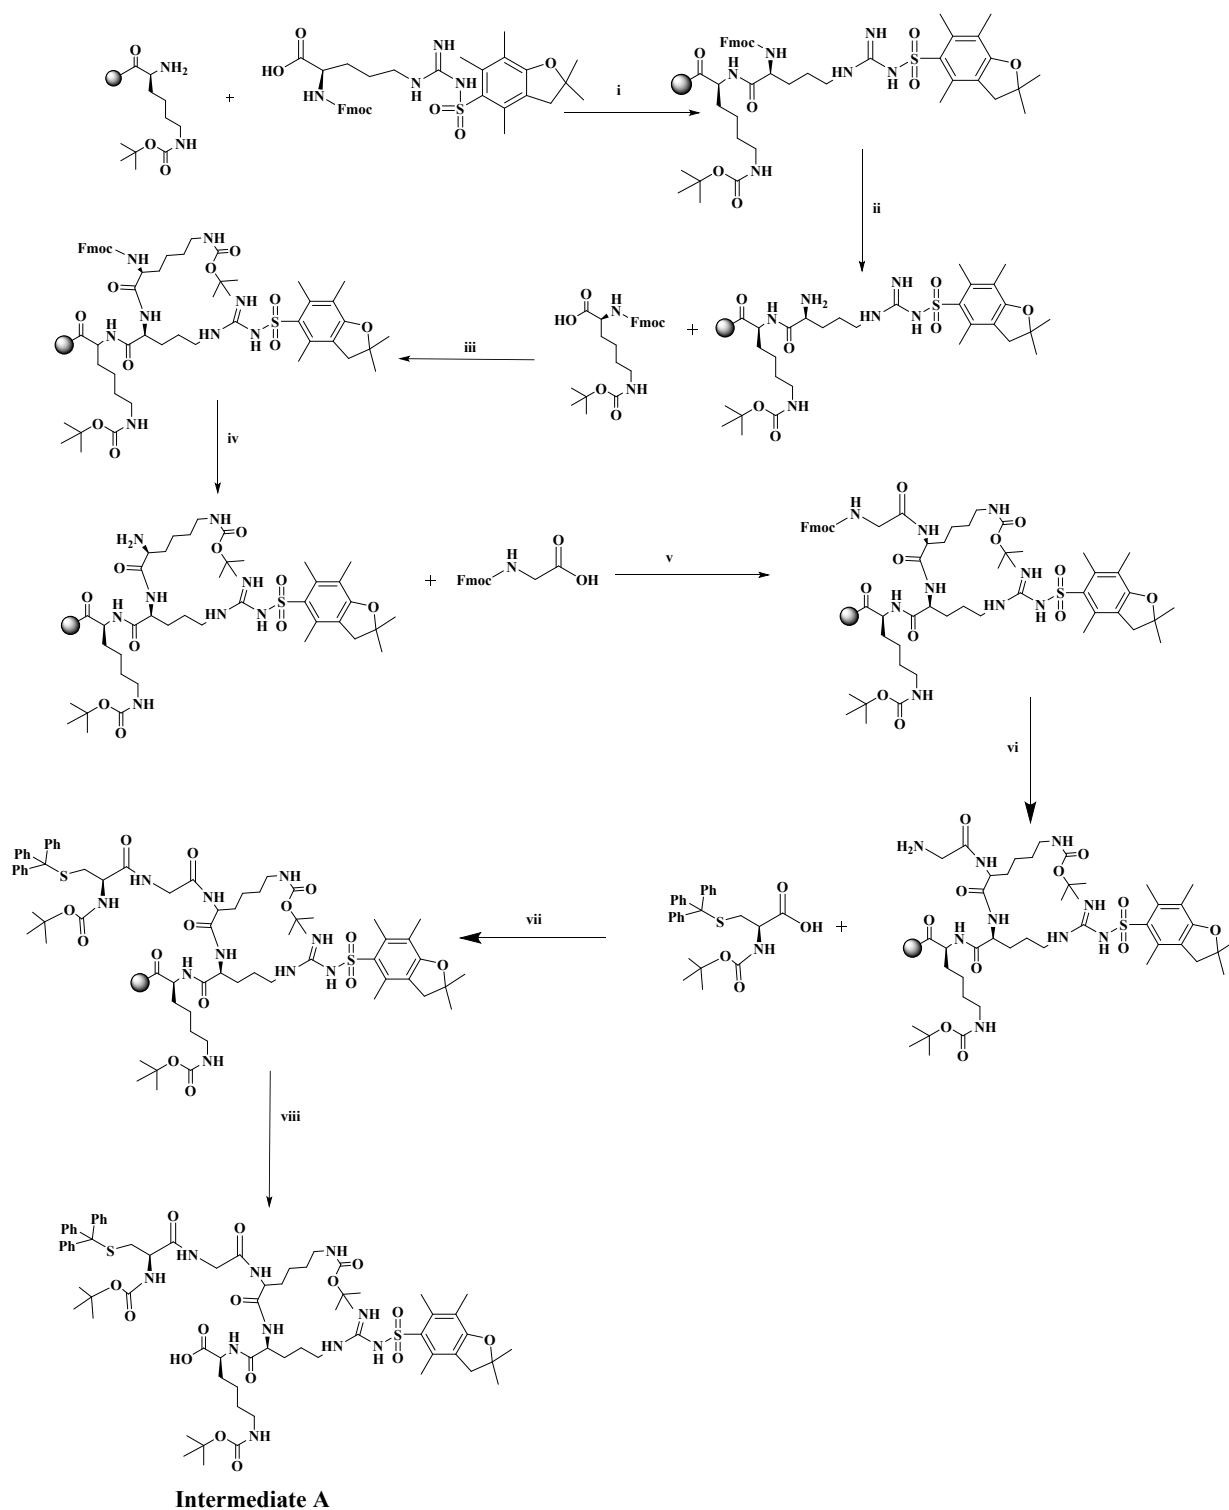

**Reagents:** i. DMF, HBTU, DIPEA, 3 h. ii. 20% PIPERIDINE iii. DMF, HBTU, DIPEA, 3 h. iv. 20% PIPERIDINE, v. HBTU, DIPEA, DMF, 3 h. vi. 20% PIPERIDINE in DMF, vii. DMF, HBTU, DIPEA, 3h, viii. 0.5% TFA/DCM, 3 h, 0 °C, DCM.

**Figure S2A.** Scheme for synthesis of protected CGKRRK-peptide.

Part

B.

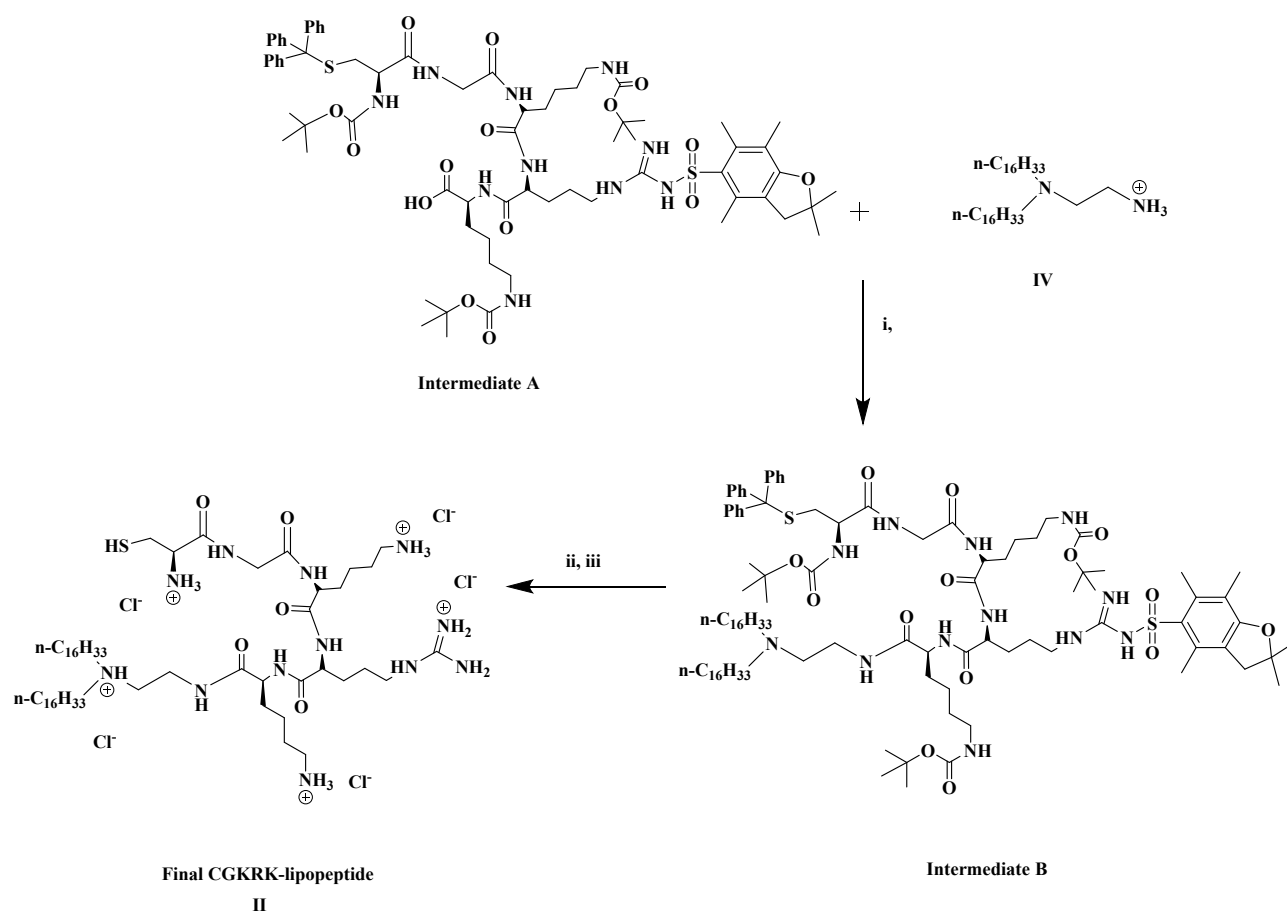

**Reagents:** i.  $N^1, N^1$ -dihexadecylethane-1,2-diamine, EDCI, HOBt, dry DCM, DIPEA, 0 °C-RT, 24 h; ii. TFA-TIS (95:5), 12 h, RT; iii. Amberlite IR 400 Cl<sup>-</sup> ion exchange resin, MeOH.

**Figure S2B.** Scheme for synthesis of final CGKRK-lipopeptide (II).

AC-WR-RGDK-PEP2  
AC-WR-rgdk-pep2 8 (0.202)

TOF MS ES+  
4.76e3

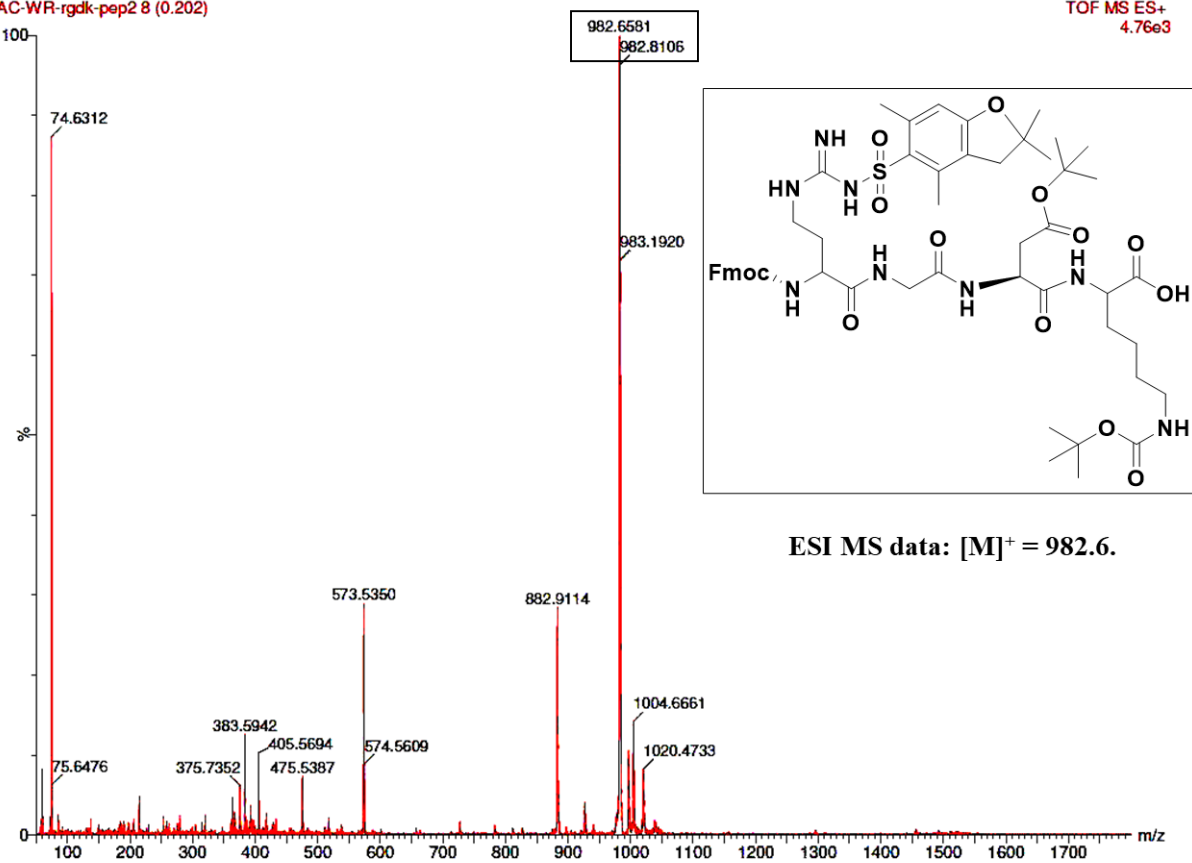

Figure S3. ESI-MS spectra of protected RGDK-peptide (Intermediate A. Figure S1A).

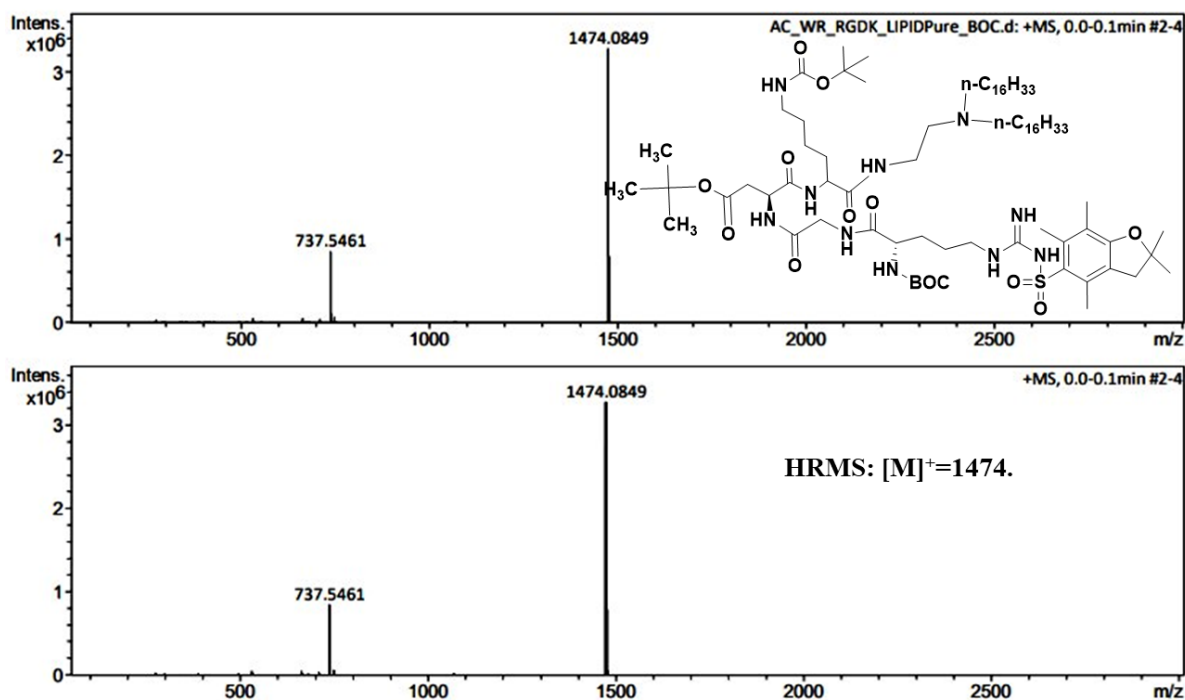

Figure S4. HRMS spectra of protected RGDK-lipopeptide (Intermediate B, Figure S1B).

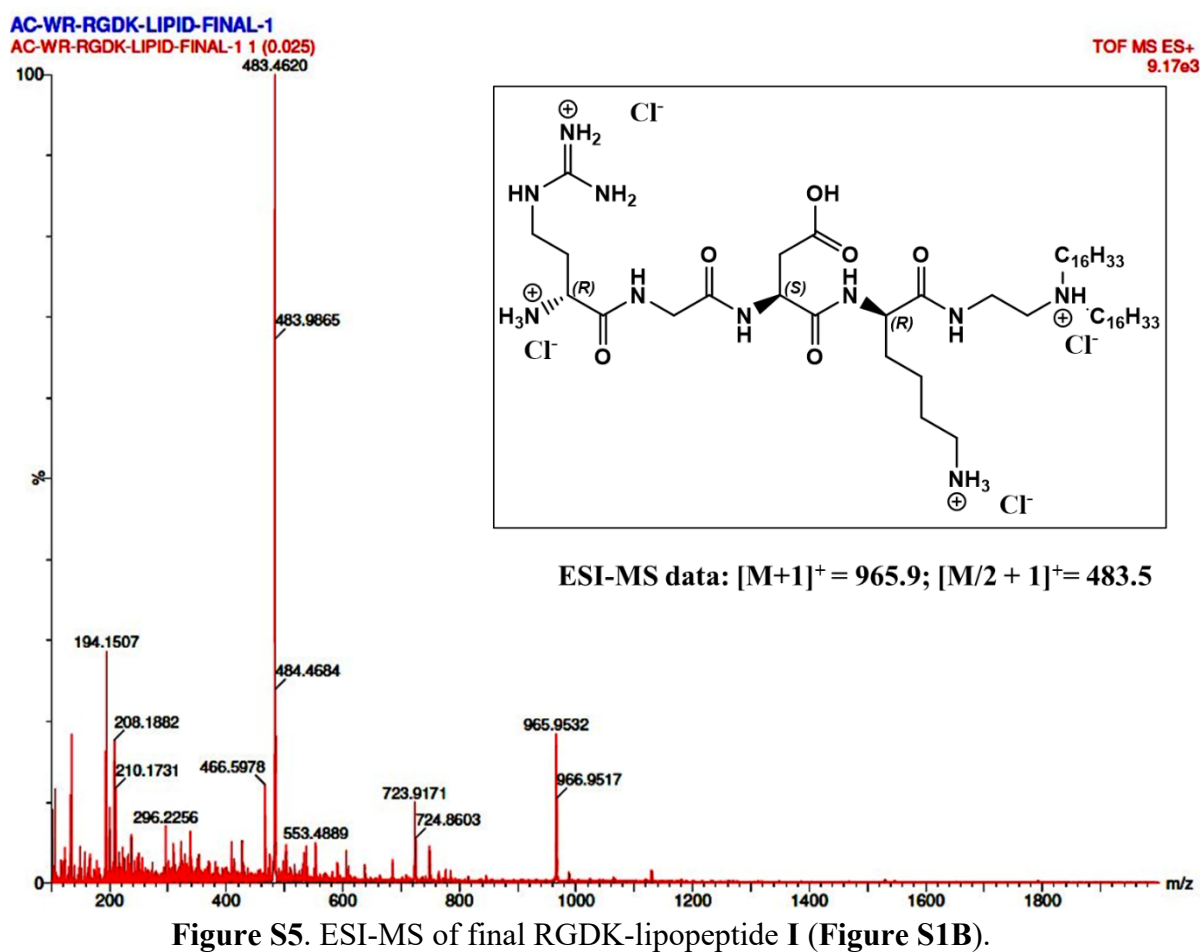

Figure S5. ESI-MS of final RGDK-lipopeptide I (Figure S1B).

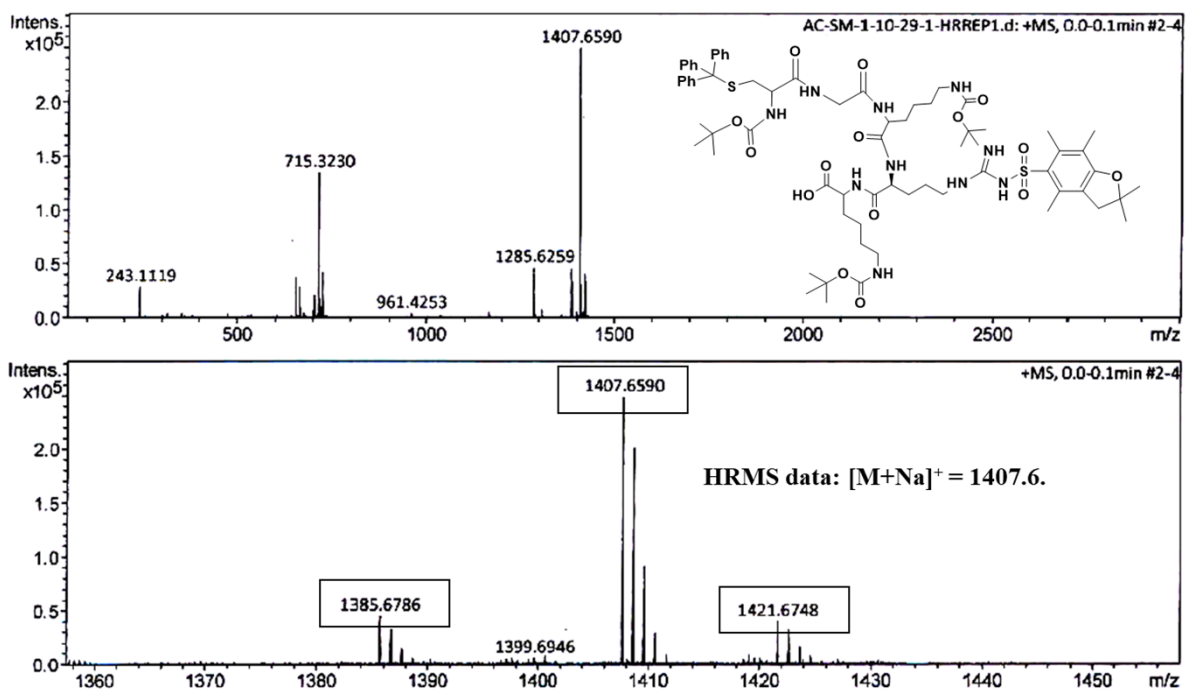

**Figure S6.** HRMS spectra of protected CGKRK-peptide (**Intermediate A, Figure S2A.**).



AC-WR-CGKRK-LIPID-P  
AC-WR-CGKRK-LIPID-P 8 (0.202)

TOF MS ES+  
1.85e3

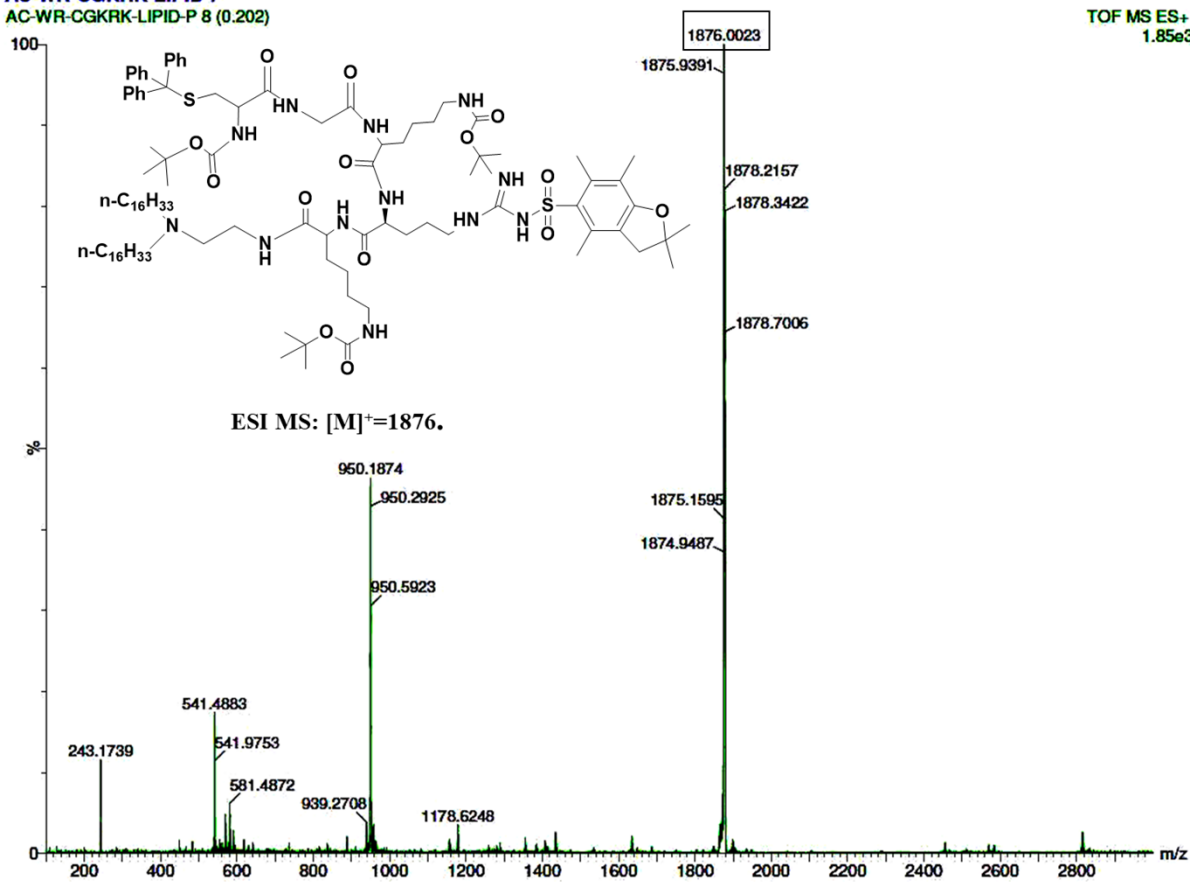

Figure S7. ESI-MS spectra of protected CGKRK-lipopeptide (Intermediate B, Figure S2B).

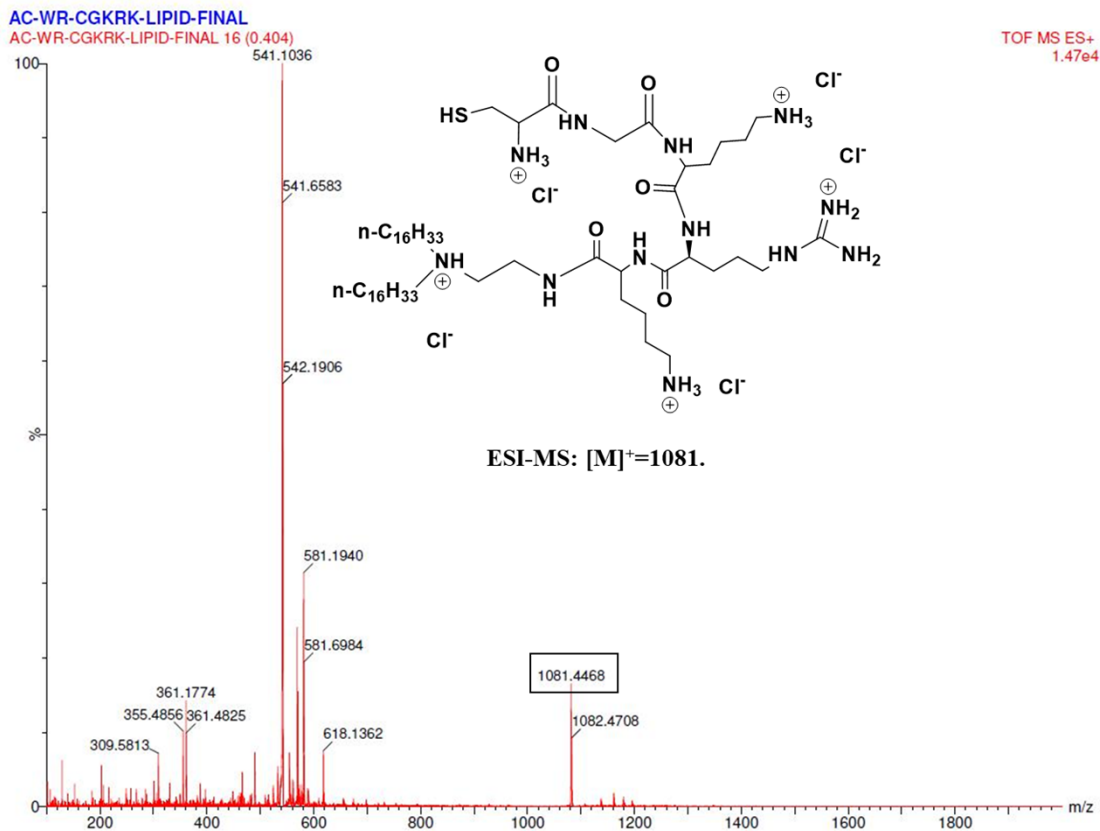

**Figure S8.** ESI-MS spectra of final CGKRK-lipopeptide (**Figure S2B**).

# HPLC

## RGDK- lipopeptide I

Mobile phase: 100% Methanol:

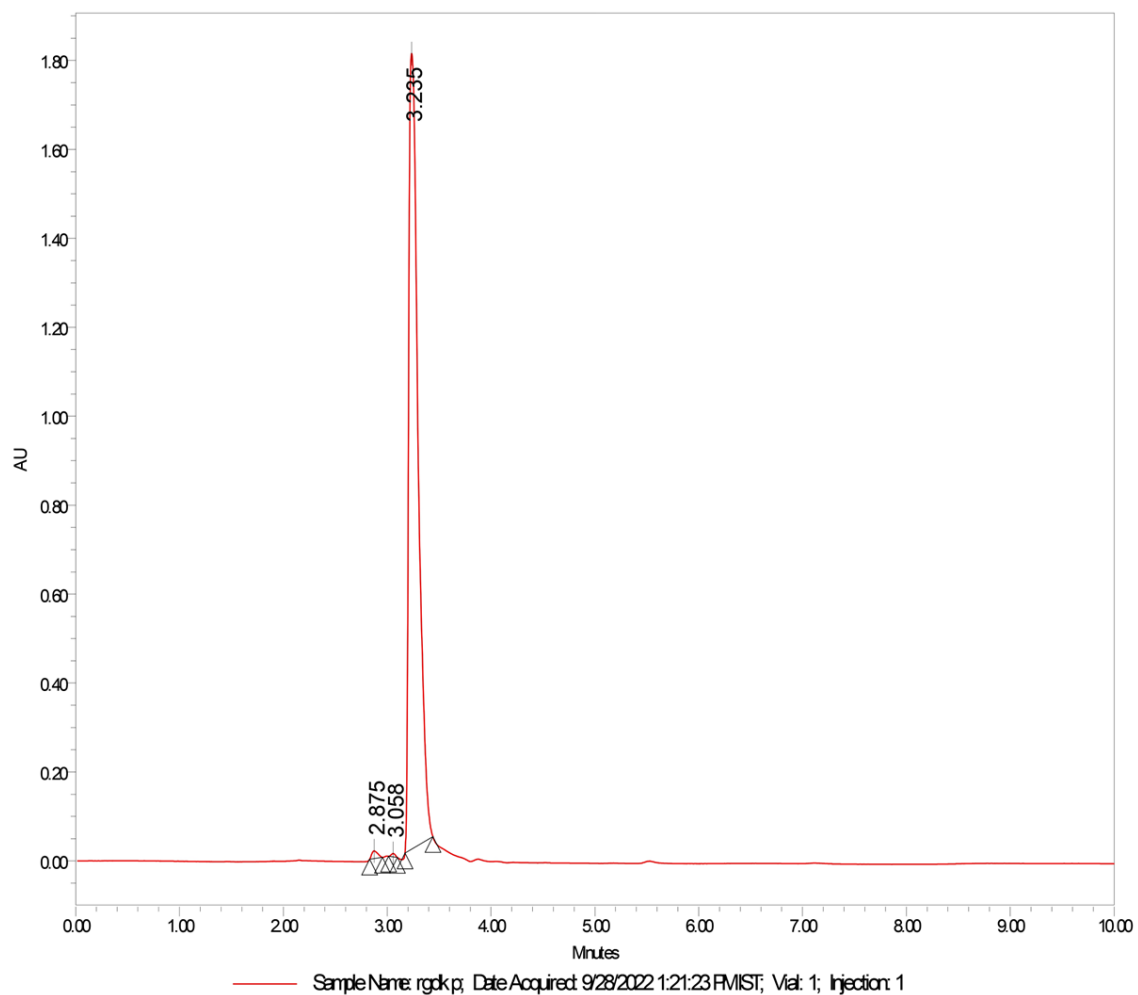

**Figure S9 A.** HPLC profiles of final RGDK-lipopeptide I (Figure 1) in 100% Methanol.

Mobile phase: 95:5 (v/v) Methanol:H<sub>2</sub>O

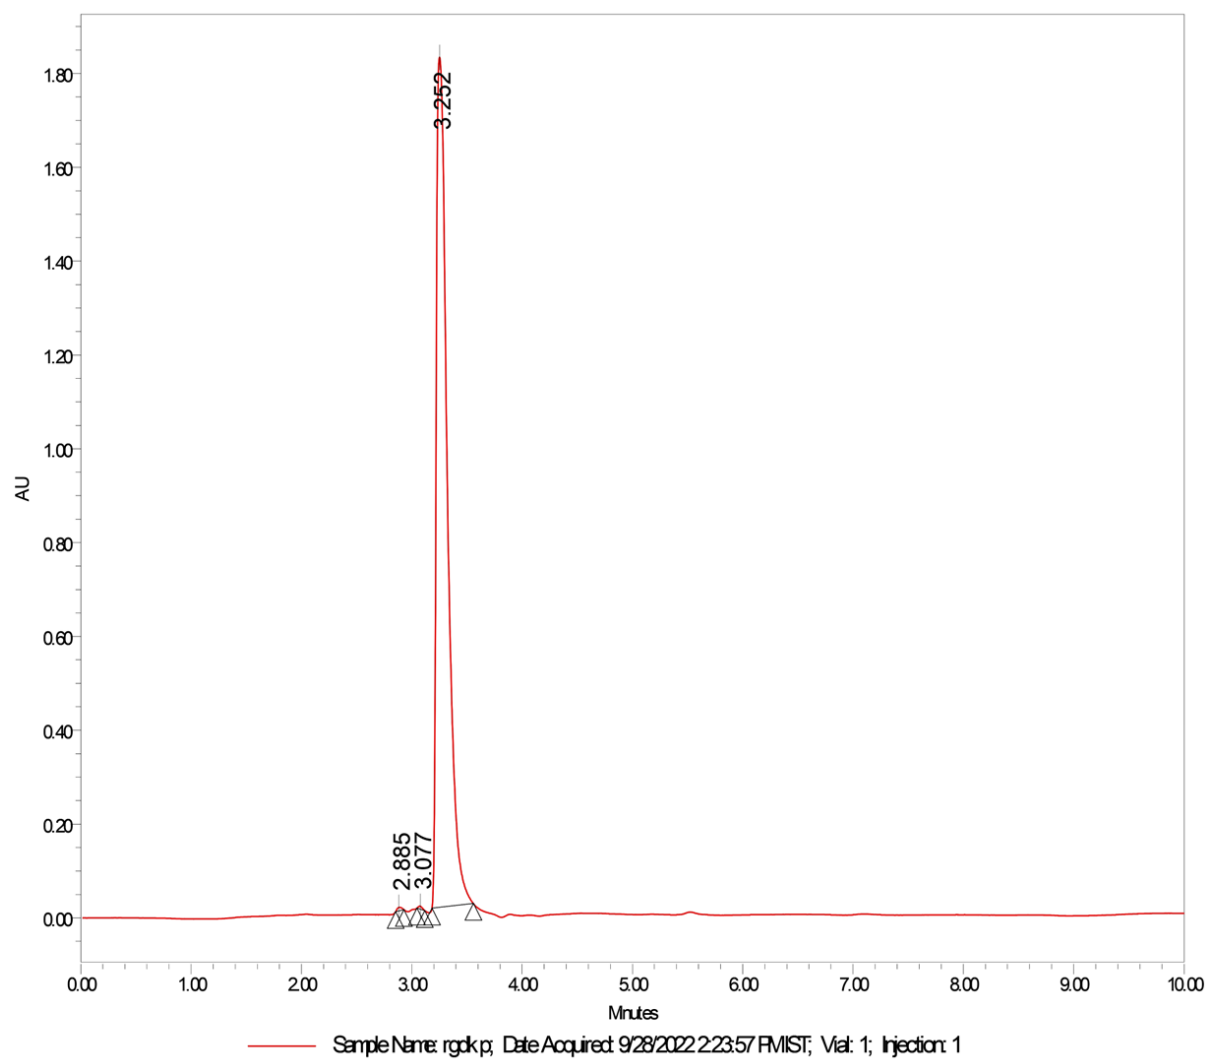

**Figure S9 B.** HPLC profiles of final RGDK-lipopeptide **I** (Figure 1) in 95:5 (v/v) Methanol:H<sub>2</sub>O.

## CGKRRK-lipopeptide

Mobile phase: 100% Methanol

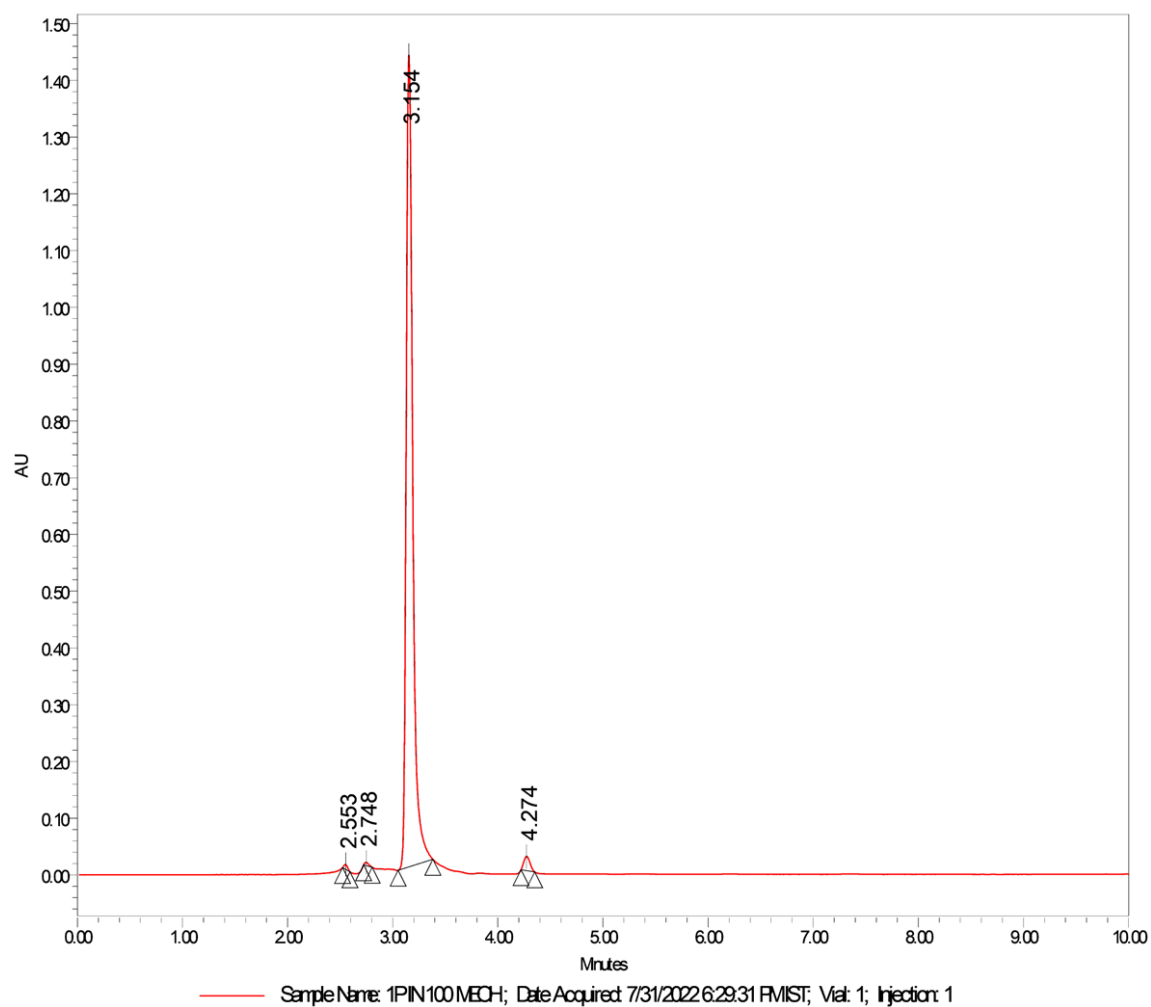

**Figure S10A.** HPLC profiles of final CGKRRK-lipopeptide **II** (Figure 1) in pure Methanol.

**Mobile phase: 95:5 (v/v) Methanol:H<sub>2</sub>O**

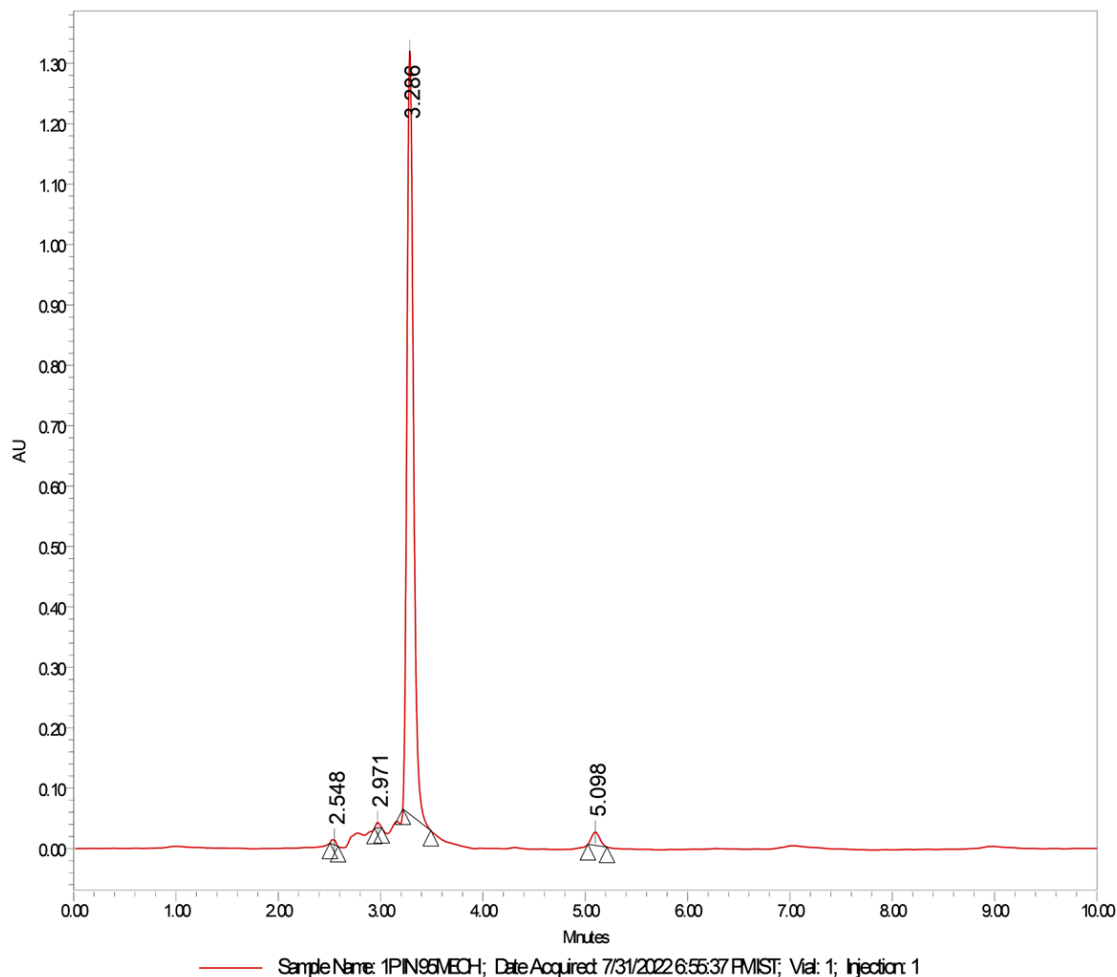

**Figure S10 B.** HPLC profiles of final CGKRR-lipo peptide **II** (Figure 1) in 95:5 (v/v) Methanol:H<sub>2</sub>O

**HPLC Conditions:**

**System:** Waters 1525

**Column:** Cosmosil C18 (4.6 ID x 250 mm)

**Mobile Phases:** Pure methanol and 95:5 (v/v) Methanol:Water

**Flow Rate:** 1.0 mL/min

**Detection:** UV at 210 nm

**A.**

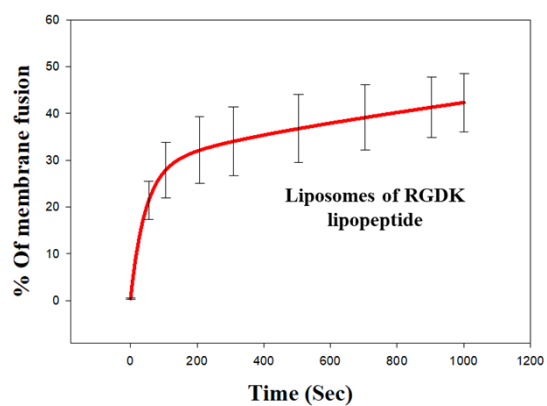

**B.**

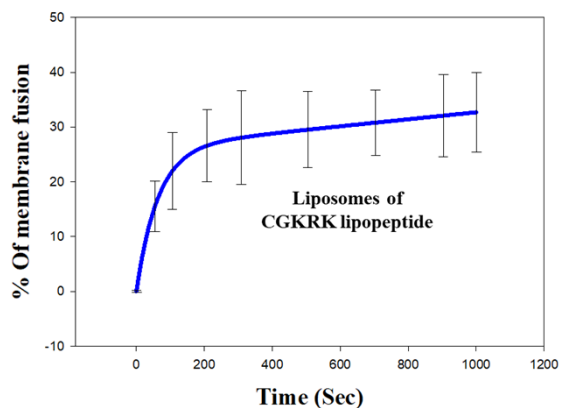

**Figure S11.** Biomembrane fusogenicities of both the liposomes of RGDK-lipopeptide (**A**) and CGKRR-lipopeptide (**B**) with model biomembranes containing error bars (based on percent of membrane fusion values observed in two repeat experiments for each time points shown).
